# Supplementary material for: Multicenter comparative study of Enterocytozoon bieneusi DNA extraction methods from stool samples, and mechanical pretreatment protocols evaluation
Source: Springer Nature journal article supplement (doi:10.1038/s41598-024-66154-2), 2024-07-04
Supplement: MOESM1 [file 41598_2024_66154_MOESM1_ESM.pdf]

## Supplementary Table S1. Design of the study

### Part 1

| <i>E. bieneusi</i> spores/mL of stool | Number of DNA extractions per concentration | Number of PCR per DNA extract | Number of PCR per concentration |
|---------------------------------------|---------------------------------------------|-------------------------------|---------------------------------|
| 0                                     | 1                                           | 2                             | 2                               |
| 5                                     | 3                                           | 6                             | 18                              |
| 25                                    | 3                                           | 6                             | 18                              |
| 50                                    | 3                                           | 6                             | 18                              |
| 500                                   | 2                                           | 11                            | 22                              |
| 5,000                                 | 2                                           | 11                            | 22                              |

### Part 2

| <i>E. bieneusi</i> spores/mL of stool | For one pair [speed/duration]* of grinding and one type of beads |                               |                                 |
|---------------------------------------|------------------------------------------------------------------|-------------------------------|---------------------------------|
|                                       | Number of DNA extractions per concentrations                     | Number of PCR per DNA extract | Number of PCR per concentration |
| 1,000                                 | 3                                                                | 3                             | 9                               |
| 5,000                                 | 3                                                                | 3                             | 9                               |
| 50,000                                | 3                                                                | 3                             | 9                               |

\*Nine pairs in total: 20 Hz/60 sec; 20 Hz/120 sec; 20 Hz/180 sec; 25 Hz/60 sec; 25 Hz/120 sec; 25 Hz/180 sec; 30 Hz/60 sec; 30 Hz/120 sec; 30 Hz/180 sec.

Sec: seconds
