# Supplementary material for: Multicenter comparative study of Enterocytozoon bieneusi DNA extraction methods from stool samples, and mechanical pretreatment protocols evaluation
Source: Springer Nature journal article supplement (doi:10.1038/s41598-024-66154-2), 2024-07-04
Supplement: MOESM2 [file 41598_2024_66154_MOESM2_ESM.pdf]

**Supplementary Table S2. Ct values obtained with each method (part 1).** When PCR was negative, Ct value was indicated as « >40 ».

| Concentration (spores/mL) | Eluate number (per each concentration) | Ct values of PCR replicates |          |          |                |          |          |          |
|---------------------------|----------------------------------------|-----------------------------|----------|----------|----------------|----------|----------|----------|
|                           |                                        | Method 1                    | Method 2 | Method 3 | Method 4       | Method 5 | Method 6 | Method 7 |
| 0                         | 1                                      | >40                         | >40      | >40      | >40            | >40      | >40      | >40      |
|                           |                                        | >40                         | >40      | >40      | >40            | >40      | >40      | >40      |
| 5                         | 1                                      | >40                         | >40      | 32.77    | 34.13          | 34.27    | >40      | >40      |
|                           |                                        | >40                         | >40      | 34.51    | 34.47          | >40      | >40      | >40      |
|                           |                                        | 34.75                       | 33.89    | 34.82    | 33.79          | 34.01    | >40      | 34.30    |
|                           |                                        | 35.26                       | >40      | >40      | 32.60          | >40      | >40      | >40      |
|                           |                                        | 34.35                       | >40      | 34.01    | >40            | >40      | >40      | >40      |
|                           |                                        | 35.67                       | >40      | 33.07    | 32.95          | 34.41    | >40      | >40      |
|                           | 2                                      | 35.59                       | >40      | 34.64    | 31.80          | >40      | >40      | >40      |
|                           |                                        | 35.24                       | 33.82    | 33.62    | 31.81          | 34.68    | >40      | 35.17    |
|                           |                                        | 34.48                       | >40      | 34.11    | 31.92          | 34.07    | >40      | >40      |
|                           |                                        | 35.77                       | 35.67    | 33.66    | 34.29          | >40      | 36.51    | 35.79    |
|                           |                                        | 34.65                       | >40      | 33.29    | 32.08          | 33.53    | >40      | >40      |
|                           |                                        | >40                         | >40      | 33.95    | 32.54          | 34.07    | >40      | 35.60    |
|                           | 3                                      | >40                         | >40      | 35.77    | 31.24          | >40      | 34.79    | 36.07    |
|                           |                                        | 35.32                       | >40      | 35.62    | 32.94          | >40      | >40      | 35.22    |
|                           |                                        | 34.73                       | >40      | 32.60    | 33.25          | >40      | 35.12    | >40      |
|                           |                                        | 35.60                       | 39.02    | 33.94    | 34.61          | 34.59    | >40      | 35.51    |
|                           |                                        | 35.24                       | >40      | 34.10    | 35.49          | >40      | 35.70    | >40      |
|                           |                                        | 36.12                       | >40      | 32.21    | 33.15          | >40      | >40      | 36.08    |
| 25                        | 1                                      | 34.15                       | >40      | 33.68    | 30.69          | >40      | 35.57    | >40      |
|                           |                                        | >40                         | >40      | 31.43    | 32.13          | 35.03    | 34.47    | 35.94    |
|                           |                                        | 34.82                       | >40      | 32.18    | 31.82          | 36.41    | 33.16    | >40      |
|                           |                                        | 34.02                       | >40      | 33.96    | 31.68          | 34.66    | >40      | >40      |
|                           |                                        | 35.79                       | >40      | 32.82    | 33.73          | 34.50    | 37.14    | >40      |
|                           |                                        | 35.59                       | >40      | 33.15    | 32.15          | >40      | >40      | 35.55    |
|                           | 2                                      | >40                         | 34.48    | 34.21    | 32.64          | >40      | >40      | 35.89    |
|                           |                                        | 33.57                       | >40      | 32.14    | 31.31          | 33.81    | >40      | 33.72    |
|                           |                                        | 34.24                       | 39.12    | 32.29    | 34.45          | 33.27    | >40      | 33.87    |
|                           |                                        | 34.98                       | >40      | 32.32    | 31.08          | 34.68    | >40      | 34.74    |
|                           |                                        | 35.31                       | >40      | 33.00    | 32.58          | >40      | >40      | >40      |
|                           |                                        | >40                         | >40      | 33.44    | 33.51          | >40      | >40      | 35.78    |
|                           | 3                                      | 33.92                       | >40      | 31.84    | 33.01          | 34.63    | >40      | 33.89    |
|                           |                                        | 34.14                       | 39.62    | 33.86    | 34.84          | >40      | >40      | 34.25    |
|                           |                                        | 31.70                       | 33.47    | 32.41    | 32.92          | >40      | >40      | >40      |
|                           |                                        | 34.87                       | >40      | 31.71    | 33.24          | 33.97    | >40      | 35.40    |
|                           |                                        | 34.97                       | >40      | 33.73    | Not enough DNA | 34.85    | >40      | 33.73    |
|                           |                                        | >40                         | >40      | 35.57    | Not enough DNA | 32.96    | >40      | 34.58    |
| 50                        | 1                                      | 33.39                       | 39.88    | 31.74    | 30.73          | 35.23    | 32.08    | 33.32    |
|                           |                                        | 32.32                       | >40      | 30.56    | 31.04          | 32.70    | 31.88    | 33.18    |
|                           |                                        | 32.07                       | 33.66    | 32.11    | 30.51          | 34.34    | 31.62    | 33.89    |
|                           |                                        | 32.76                       | >40      | 31.58    | 29.55          | 33.11    | 32.21    | 35.15    |
|                           |                                        | 32.51                       | 34.53    | 32.08    | 31.82          | 32.59    | 32.88    | 33.47    |
|                           |                                        | 32.28                       | >40      | 31.01    | 31.93          | 33.16    | 32.17    | 35.52    |
|                           | 2                                      | 32.38                       | >40      | 32.59    | 30.16          | 34.46    | 34.45    | 32.88    |
|                           |                                        | 32.87                       | 34.52    | 31.42    | 30.70          | 31.99    | 35.63    | 33.09    |
|                           |                                        | 31.66                       | 33.27    | 32.22    | 30.20          | 32.32    | 34.58    | 32.25    |
|                           |                                        | 35.81                       | >40      | 31.55    | 31.14          | 32.51    | >40      | 32.88    |
|                           |                                        | 34.21                       | 41.15    | 31.59    | 30.40          | 33.67    | >40      | 32.53    |
|                           |                                        | 32.75                       | >40      | 31.48    | 30.24          | 33.18    | >40      | 33.74    |
|                           | 3                                      | 33.07                       | 34.21    | 30.83    | 30.53          | 33.00    | >40      | 33.39    |
|                           |                                        | 33.40                       | 34.05    | 31.35    | 30.32          | 32.65    | >40      | 33.55    |
|                           |                                        | 33.36                       | >40      | 31.77    | 30.91          | 33.61    | >40      | 33.26    |
|                           |                                        | 32.56                       | 33.62    | 31.44    | 30.46          | 32.37    | >40      | 33.56    |
|                           |                                        | 33.07                       | >40      | 31.38    | 30.07          | 33.94    | >40      | 32.60    |
|                           |                                        | 33.14                       | >40      | 31.50    | 31.18          | 34.48    | >40      | 32.56    |

| Concentration (spores/mL) | Eluate number (per each concentration) | Ct values of PCR replicates |          |          |          |          |          |          |
|---------------------------|----------------------------------------|-----------------------------|----------|----------|----------|----------|----------|----------|
|                           |                                        | Method 1                    | Method 2 | Method 3 | Method 4 | Method 5 | Method 6 | Method 7 |
| 500                       | 1                                      | 32.85                       | >40      | 31.87    | 30.19    | 32.25    | 33.59    | 32.96    |
|                           |                                        | 32.22                       | >40      | 30.64    | 29.40    | 32.04    | >40      | 32.91    |
|                           |                                        | 33.17                       | >40      | 30.06    | 30.35    | 31.76    | 34.76    | 32.21    |
|                           |                                        | 32.61                       | 33.39    | 31.02    | 30.99    | 31.67    | 33.05    | 32.48    |
|                           |                                        | 33.71                       | >40      | 30.16    | 31.04    | 31.02    | 32.56    | 32.15    |
|                           |                                        | 34.17                       | >40      | 30.74    | 29.99    | 31.36    | 33.01    | 32.33    |
|                           |                                        | 32.57                       | >40      | 30.80    | 30.98    | 32.68    | 33.26    | 32.89    |
|                           |                                        | 32.61                       | 35.81    | 30.70    | 30.54    | 31.93    | 32.80    | 32.05    |
|                           |                                        | 32.66                       | >40      | 31.44    | 30.57    | 33.19    | 32.23    | 33.22    |
|                           | 32.43                                  | 33.43                       | 30.99    | 30.65    | 31.84    | 32.03    | 32.75    |          |
|                           | 32.76                                  | >40                         | 30.87    | 30.62    | 33.18    | 31.54    | 32.65    |          |
|                           | 32.86                                  | >40                         | 29.82    | 30.68    | 33.40    | 32.84    | 33.09    |          |
|                           | 33.16                                  | >40                         | 30.43    | 30.60    | 32.76    | 32.75    | 32.82    |          |
|                           | 32.19                                  | >40                         | 29.80    | 29.78    | 32.65    | 31.67    | 33.47    |          |
|                           | 32.56                                  | >40                         | 30.55    | 30.46    | 32.77    | 32.81    | 33.32    |          |
|                           | 32.89                                  | >40                         | 31.32    | 30.88    | 32.35    | 32.80    | 32.70    |          |
|                           | 32.40                                  | >40                         | 30.96    | 29.79    | 33.33    | 33.84    | 32.43    |          |
|                           | 33.11                                  | 33.74                       | 32.24    | 29.49    | 32.84    | >40      | 33.26    |          |
| 32.73                     | >40                                    | 30.52                       | 29.96    | 33.40    | 33.14    | 32.99    |          |          |
| 33.40                     | >40                                    | 30.04                       | 30.56    | 29.60    | 33.25    | 32.72    |          |          |
| 32.95                     | >40                                    | 31.77                       | 29.87    | 32.74    | 34.26    | 33.07    |          |          |
| 32.69                     | 33.84                                  | 30.80                       | 29.80    | 32.54    | 32.44    | 32.36    |          |          |
| 5,000                     | 1                                      | 29.75                       | 32.40    | 27.35    | 27.08    | 28.74    | 35.24    | 28.92    |
|                           |                                        | 29.23                       | 33.11    | 27.73    | 26.68    | 29.45    | 30.54    | 29.32    |
|                           |                                        | 29.46                       | 32.86    | 27.54    | 26.80    | 29.15    | 30.74    | 29.54    |
|                           |                                        | 29.51                       | 32.73    | 27.55    | 26.21    | 29.20    | 30.60    | 29.41    |
|                           |                                        | 29.72                       | 33.01    | 27.69    | 26.82    | 29.42    | 29.50    | 29.39    |
|                           |                                        | 29.47                       | 34.77    | 27.48    | 26.76    | 29.10    | 30.28    | 29.19    |
|                           |                                        | 29.31                       | 32.59    | 27.97    | 26.33    | 28.83    | 30.80    | 28.88    |
|                           |                                        | 29.28                       | 32.22    | 27.97    | 26.52    | 29.39    | 30.37    | 29.46    |
|                           |                                        | 29.91                       | 31.88    | 27.90    | 26.85    | 29.78    | 30.57    | 29.32    |
|                           | 29.75                                  | 32.29                       | 27.67    | 27.22    | 28.85    | 30.72    | 29.52    |          |
|                           | 29.24                                  | 33.20                       | 27.33    | 26.77    | 29.37    | 30.64    | 29.78    |          |
|                           | 28.94                                  | 32.56                       | 27.60    | 27.00    | 29.38    | 30.16    | 30.12    |          |
|                           | 29.12                                  | 30.58                       | 27.54    | 27.09    | 29.43    | 29.83    | 29.66    |          |
|                           | 29.43                                  | 32.94                       | 27.60    | 26.74    | 29.29    | 30.21    | 29.99    |          |
|                           | 28.82                                  | 33.24                       | 27.61    | 26.40    | 29.77    | 30.62    | 29.50    |          |
|                           | 29.12                                  | 32.39                       | 27.78    | 26.80    | 29.63    | 30.05    | 30.05    |          |
|                           | 28.53                                  | 31.63                       | 28.00    | 26.57    | 29.58    | 30.41    | 30.25    |          |
|                           | 28.63                                  | 31.86                       | 27.65    | 27.08    | 29.69    | 29.52    | 29.84    |          |
| 28.76                     | 32.27                                  | 27.96                       | 27.22    | 29.50    | 30.59    | 30.58    |          |          |
| 28.84                     | 34.34                                  | 27.47                       | 26.88    | 30.00    | 30.55    | 30.17    |          |          |
| 28.93                     | 30.89                                  | 27.72                       | 26.92    | 28.86    | 30.29    | 30.08    |          |          |
| 29.07                     | 30.89                                  | 27.39                       | 26.87    | 29.45    | 29.89    | 30.17    |          |          |
