# Supplementary material for: Multicenter comparative study of Enterocytozoon bieneusi DNA extraction methods from stool samples, and mechanical pretreatment protocols evaluation
Source: Springer Nature journal article supplement (doi:10.1038/s41598-024-66154-2), 2024-07-04
Supplement: MOESM3 [file 41598_2024_66154_MOESM3_ESM.pdf]

**Supplementary Table S3. Ct values obtained with each mechanical pretreatment protocol (part 2).**

| Beads       | Spores/mL of stool | Grinding duration (sec) | Grinding speed (Hz) | DNA extract number | Ct values of replicates |       |       |
|-------------|--------------------|-------------------------|---------------------|--------------------|-------------------------|-------|-------|
|             |                    |                         |                     |                    | PCR1                    | PCR2  | PCR3  |
| Glass beads | 1,000              | 60                      | 20                  | 1                  | 19.43                   | 20.17 | 19.82 |
|             |                    |                         |                     | 2                  | 20.02                   | 20.40 | 19.48 |
|             |                    |                         |                     | 3                  | 20.81                   | 20.80 | 20.43 |
|             |                    |                         | 25                  | 1                  | 22.04                   | 20.79 | 21.35 |
|             |                    |                         |                     | 2                  | 22.10                   | 21.76 | 21.92 |
|             |                    |                         |                     | 3                  | 21.90                   | 20.80 | 21.00 |
|             |                    |                         | 30                  | 1                  | 19.00                   | 19.93 | 20.12 |
|             |                    |                         |                     | 2                  | 20.14                   | 20.43 | 19.73 |
|             |                    |                         |                     | 3                  | 21.75                   | 21.97 | 21.58 |
|             |                    | 120                     | 20                  | 1                  | 19.90                   | 21.37 | 21.10 |
|             |                    |                         |                     | 2                  | 21.22                   | 21.78 | 20.82 |
|             |                    |                         |                     | 3                  | 21.92                   | 21.83 | 22.13 |
|             |                    |                         | 25                  | 1                  | 20.29                   | 21.58 | 20.18 |
|             |                    |                         |                     | 2                  | 20.54                   | 20.47 | 21.05 |
|             |                    |                         |                     | 3                  | 21.14                   | 21.75 | 21.05 |
|             |                    |                         | 30                  | 1                  | 21.69                   | 21.21 | 21.82 |
|             |                    |                         |                     | 2                  | 21.05                   | 22.64 | 22.71 |
|             |                    |                         |                     | 3                  | 22.15                   | 22.39 | 21.90 |
|             |                    | 180                     | 20                  | 1                  | 19.79                   | 19.71 | 20.67 |
|             |                    |                         |                     | 2                  | 20.72                   | 20.49 | 20.10 |
|             |                    |                         |                     | 3                  | 20.78                   | 19.14 | 21.64 |
|             |                    |                         | 25                  | 1                  | 20.00                   | 20.34 | 20.14 |
|             |                    |                         |                     | 2                  | 20.92                   | 21.16 | 19.52 |
|             |                    |                         |                     | 3                  | 20.66                   | 20.43 | 20.80 |
|             | 30                 |                         | 1                   | 21.55              | 22.22                   | 21.36 |       |
|             |                    |                         | 2                   | 21.85              | 21.37                   | 22.10 |       |
|             |                    |                         | 3                   | 22.67              | 22.25                   | 21.72 |       |
|             | 5,000              | 60                      | 20                  | 1                  | 23.24                   | 22.42 | 22.91 |
|             |                    |                         |                     | 2                  | 24.86                   | 25.34 | 26.61 |
|             |                    |                         |                     | 3                  | 26.37                   | 26.22 | 25.28 |
|             |                    |                         | 25                  | 1                  | 24.71                   | 25.44 | 25.01 |
|             |                    |                         |                     | 2                  | 25.05                   | 25.34 | 24.93 |
|             |                    |                         |                     | 3                  | 25.51                   | 25.21 | 25.74 |
|             |                    |                         | 30                  | 1                  | 21.75                   | 23.02 | 22.45 |
|             |                    |                         |                     | 2                  | 21.21                   | 24.31 | 23.27 |
|             |                    |                         |                     | 3                  | 23.15                   | 23.94 | 25.83 |
|             |                    | 120                     | 20                  | 1                  | 24.89                   | 23.99 | 23.22 |
|             |                    |                         |                     | 2                  | 24.68                   | 23.79 | 24.27 |
|             |                    |                         |                     | 3                  | 25.46                   | 25.32 | 24.70 |

|             |     |        |    |       |       |       |       |       |
|-------------|-----|--------|----|-------|-------|-------|-------|-------|
| Glass beads |     | 180    | 25 | 1     | 25.14 | 24.00 | 24.40 |       |
|             |     |        |    | 2     | 23.99 | 24.94 | 26.04 |       |
|             |     |        |    | 3     | 26.04 | 24.49 | 25.62 |       |
|             |     |        | 30 | 1     | 24.16 | 24.79 | 24.11 |       |
|             |     |        |    | 2     | 23.98 | 26.28 | 24.26 |       |
|             |     |        |    | 3     | 24.68 | 25.18 | 25.41 |       |
|             |     |        | 20 | 1     | 1     | 24.53 | 24.77 | 24.80 |
|             |     |        |    |       | 2     | 24.80 | 24.95 | 24.72 |
|             |     |        |    |       | 3     | 22.92 | 25.06 | 24.17 |
|             |     | 25     |    | 1     | 23.10 | 22.39 | 23.73 |       |
|             |     |        |    | 2     | 25.08 | 25.22 | 25.23 |       |
|             |     |        |    | 3     | 24.68 | 25.22 | 24.78 |       |
|             |     | 30     |    | 1     | 23.77 | 24.01 | 24.73 |       |
|             |     |        |    | 2     | 23.51 | 24.24 | 24.75 |       |
|             |     |        |    | 3     | 25.05 | 24.51 | 24.68 |       |
|             |     | 50,000 | 60 | 20    | 1     | 25.25 | 25.13 | 26.26 |
|             |     |        |    |       | 2     | 26.05 | 26.34 | 25.22 |
|             |     |        |    |       | 3     | 27.17 | 27.09 | 27.46 |
|             | 25  |        |    | 1     | 28.27 | 28.53 | 27.97 |       |
|             |     |        |    | 2     | 28.55 | 27.82 | 30.08 |       |
|             |     |        |    | 3     | 27.73 | 28.29 | 26.80 |       |
|             | 30  |        |    | 1     | 25.24 | 25.06 | 24.30 |       |
|             |     |        |    | 2     | 26.32 | 27.07 | 27.40 |       |
|             |     |        |    | 3     | 27.97 | 27.84 | 27.66 |       |
|             | 120 |        | 20 | 1     | 25.25 | 26.04 | 26.28 |       |
|             |     |        |    | 2     | 27.34 | 27.22 | 23.84 |       |
|             |     |        |    | 3     | 27.39 | 27.92 | 27.02 |       |
|             |     |        | 25 | 1     | 26.22 | 27.18 | 26.59 |       |
|             |     |        |    | 2     | 27.93 | 28.21 | 28.17 |       |
|             |     |        |    | 3     | 27.99 | 28.26 | 28.18 |       |
|             |     |        | 30 | 1     | 24.42 | 26.77 | 26.92 |       |
|             |     |        |    | 2     | 27.23 | 25.55 | 26.34 |       |
|             |     |        |    | 3     | 26.02 | 27.59 | 26.95 |       |
|             | 180 | 20     | 1  | 25.24 | 26.77 | 26.23 |       |       |
|             |     |        | 2  | 25.02 | 24.97 | 25.87 |       |       |
|             |     |        | 3  | 25.95 | 24.73 | 26.07 |       |       |
|             |     | 25     | 1  | 28.49 | 28.34 | 27.36 |       |       |
|             |     |        | 2  | 28.20 | 28.46 | 27.96 |       |       |
|             |     |        | 3  | 29.18 | 29.02 | 27.14 |       |       |
|             |     | 30     | 1  | 28.19 | 26.70 | 26.78 |       |       |
|             |     |        | 2  | 27.34 | 27.01 | 26.36 |       |       |
|             |     |        | 3  | 26.14 | 26.43 | 27.74 |       |       |

|                    |       |     |    |       |                |       |                |
|--------------------|-------|-----|----|-------|----------------|-------|----------------|
| MP Lysing Matrix E | 1,000 | 60  | 20 | 1     | 20.62          | 20.60 | 21.22          |
|                    |       |     |    | 2     | 20.46          | 21.79 | 20.58          |
|                    |       |     |    | 3     | 21.87          | 21.60 | 21.27          |
|                    |       |     | 25 | 1     | 21.28          | 21.69 | 22.39          |
|                    |       |     |    | 2     | 21.55          | 21.40 | 22.11          |
|                    |       |     |    | 3     | 21.84          | 23.49 | 22.59          |
|                    |       |     | 30 | 1     | 20.74          | 20.32 | 18.68          |
|                    |       |     |    | 2     | 19.35          | 20.46 | 20.04          |
|                    |       |     |    | 3     | 20.35          | 20.52 | 20.95          |
|                    |       | 120 | 20 | 1     | 21.13          | 20.88 | 21.73          |
|                    |       |     |    | 2     | 21.66          | 22.36 | 21.45          |
|                    |       |     |    | 3     | 22.93          | 22.24 | 22.30          |
|                    |       |     | 25 | 1     | 21.32          | 20.27 | 20.95          |
|                    |       |     |    | 2     | 21.10          | 20.47 | 21.27          |
|                    |       |     |    | 3     | 21.72          | 22.04 | 21.73          |
|                    |       |     | 30 | 1     | Not enough DNA | 20.49 | Not enough DNA |
|                    |       |     |    | 2     | Not enough DNA | 21.23 | Not enough DNA |
|                    |       |     |    | 3     | 21.93          | 21.95 | 22.15          |
|                    |       | 180 | 20 | 1     | 20.20          | 21.32 | 22.26          |
|                    |       |     |    | 2     | 21.57          | 21.77 | 21.94          |
|                    |       |     |    | 3     | 22.89          | 22.54 | 22.35          |
|                    |       |     | 25 | 1     | 21.00          | 20.62 | 20.84          |
|                    |       |     |    | 2     | 21.80          | 21.99 | 21.60          |
|                    |       |     |    | 3     | 21.63          | 22.09 | 22.11          |
|                    | 30    |     | 1  | 21.10 | 20.23          | 19.95 |                |
|                    |       |     | 2  | 20.56 | 20.88          | 20.70 |                |
|                    |       |     | 3  | 21.33 | 21.08          | 21.45 |                |
|                    | 5,000 | 60  | 20 | 1     | 24.00          | 24.12 | 24.40          |
|                    |       |     |    | 2     | 23.74          | 24.46 | 25.10          |
|                    |       |     |    | 3     | 24.62          | 25.49 | 26.02          |
|                    |       |     | 25 | 1     | 24.75          | 25.57 | 25.26          |
|                    |       |     |    | 2     | 24.96          | 25.26 | 25.56          |
|                    |       |     |    | 3     | 24.20          | 25.00 | 23.95          |
|                    |       | 30  | 1  | 20.34 | 20.88          | 22.05 |                |
|                    |       |     | 2  | 20.88 | 23.24          | 22.93 |                |
|                    |       |     | 3  | 22.17 | 22.50          | 22.51 |                |
|                    |       | 120 | 20 | 1     | 24.66          | 22.38 | 21.14          |
|                    |       |     |    | 2     | 24.12          | 24.45 | 23.42          |
|                    |       |     |    | 3     | 23.98          | 25.00 | 25.13          |
|                    | 25    |     | 1  | 24.20 | 23.94          | 24.06 |                |

|                    |    |     |       |                |       |                |       |       |
|--------------------|----|-----|-------|----------------|-------|----------------|-------|-------|
| MP Lysing Matrix E |    |     |       | 2              | 24.63 | 23.63          | 24.39 |       |
|                    |    |     |       | 3              | 24.40 | 24.85          | 24.53 |       |
|                    |    |     |       | 30             | 1     | 23.28          | 23.33 | 24.04 |
|                    |    |     | 30    | 2              | 24.50 | 24.05          | 23.18 |       |
|                    |    |     |       | 3              | 24.19 | 23.98          | 23.92 |       |
|                    |    |     |       | 20             | 1     | 24.28          | 23.85 | 24.49 |
|                    |    |     | 180   | 20             | 2     | 23.51          | 22.78 | 22.86 |
|                    |    |     |       |                | 3     | 25.04          | 24.35 | 23.31 |
|                    |    |     |       |                | 25    | 1              | 24.04 | 23.81 |
|                    |    | 25  |       | 2              | 24.05 | 23.66          | 24.66 |       |
|                    |    |     |       | 3              | 24.30 | 24.72          | 24.26 |       |
|                    |    |     |       | 30             | 1     | 23.96          | 24.02 | 23.24 |
|                    |    | 30  | 2     | 2              | 23.78 | 24.03          | 23.86 |       |
|                    |    |     |       | 3              | 23.89 | 23.87          | 24.03 |       |
|                    |    |     |       | 20             | 1     | 26.02          | 26.34 | 25.14 |
|                    |    |     | 60    | 20             | 2     | 26.30          | 26.17 | 26.29 |
|                    |    |     |       |                | 3     | 26.52          | 26.89 | 27.42 |
|                    |    |     |       |                | 25    | 1              | 29.22 | 28.16 |
|                    | 25 | 2   |       | 28.41          | 27.30 | 26.90          |       |       |
|                    |    | 3   |       | 27.39          | 27.63 | 27.90          |       |       |
|                    |    | 30  |       | 1              | 25.50 | 24.10          | 24.01 |       |
|                    | 30 | 2   | 2     | 26.20          | 24.63 | 26.28          |       |       |
|                    |    |     | 3     | 25.86          | 25.89 | 25.50          |       |       |
|                    |    |     | 20    | 1              | 26.15 | 21.87          | 26.35 |       |
|                    |    | 120 | 20    | 2              | 27.10 | 27.48          | 27.19 |       |
|                    |    |     |       | 3              | 27.30 | 27.61          | 27.43 |       |
|                    |    |     |       | 25             | 1     | 25.99          | 25.34 | 27.40 |
|                    | 25 |     | 2     | 26.04          | 27.12 | 26.79          |       |       |
|                    |    |     | 3     | 25.57          | 26.83 | 27.91          |       |       |
|                    |    |     | 30    | 1              | 25.26 | 26.39          | 26.31 |       |
|                    | 30 | 2   | 2     | Not enough DNA | 26.24 | Not enough DNA |       |       |
|                    |    |     | 3     | 27.35          | 27.14 | 27.20          |       |       |
|                    |    |     | 20    | 1              | 27.07 | 26.77          | 26.74 |       |
|                    |    | 180 | 20    | 2              | 27.20 | 27.12          | 27.13 |       |
|                    |    |     |       | 3              | 26.81 | 26.92          | 24.91 |       |
|                    |    |     |       | 25             | 1     | 25.31          | 25.81 | 26.58 |
|                    | 25 |     | 2     | 25.94          | 25.72 | 26.35          |       |       |
|                    |    |     | 3     | 26.53          | 26.20 | 25.93          |       |       |
|                    |    |     | 30    | 1              | 27.27 | 27.14          | 27.02 |       |
|                    | 30 | 2   | 26.99 | 26.57          | 24.77 |                |       |       |
|                    |    | 3   | 25.27 | 25.42          | 25.76 |                |       |       |

|                 |       |     |    |       |       |       |       |
|-----------------|-------|-----|----|-------|-------|-------|-------|
| ZR BashingBeads | 1,000 | 60  | 20 | 1     | 21.23 | 20.19 | 20.87 |
|                 |       |     |    | 2     | 20.69 | 21.41 | 21.04 |
|                 |       |     |    | 3     | 20.99 | 21.28 | 21.09 |
|                 |       |     | 25 | 1     | 21.22 | 21.24 | 21.73 |
|                 |       |     |    | 2     | 21.73 | 22.40 | 21.84 |
|                 |       |     |    | 3     | 21.22 | 21.10 | 21.17 |
|                 |       |     | 30 | 1     | 18.28 | 19.23 | 19.04 |
|                 |       |     |    | 2     | 19.54 | 19.88 | 18.56 |
|                 |       |     |    | 3     | 20.89 | 19.03 | 18.84 |
|                 |       | 120 | 20 | 1     | 21.09 | 20.62 | 20.77 |
|                 |       |     |    | 2     | 20.76 | 21.54 | 21.47 |
|                 |       |     |    | 3     | 21.02 | 21.10 | 22.79 |
|                 |       |     | 25 | 1     | 20.69 | 20.59 | 20.01 |
|                 |       |     |    | 2     | 20.45 | 21.34 | 21.09 |
|                 |       |     |    | 3     | 20.83 | 21.43 | 21.08 |
|                 |       |     | 30 | 1     | 20.09 | 19.13 | 19.99 |
|                 |       |     |    | 2     | 20.83 | 20.99 | 20.40 |
|                 |       |     |    | 3     | 21.63 | 20.37 | 21.11 |
|                 |       | 180 | 20 | 1     | 21.99 | 21.17 | 20.69 |
|                 |       |     |    | 2     | 20.59 | 20.85 | 19.75 |
|                 |       |     |    | 3     | 20.26 | 21.84 | 21.53 |
|                 |       |     | 25 | 1     | 18.86 | 20.77 | 20.30 |
|                 |       |     |    | 2     | 20.06 | 20.78 | 21.32 |
|                 |       |     |    | 3     | 20.62 | 20.96 | 21.01 |
|                 | 30    |     | 1  | 20.02 | 20.67 | 21.06 |       |
|                 |       |     | 2  | 21.08 | 20.12 | 21.44 |       |
|                 |       |     | 3  | 21.65 | 20.66 | 21.82 |       |
|                 | 5,000 | 60  | 20 | 1     | 23.42 | 22.76 | 23.55 |
|                 |       |     |    | 2     | 23.22 | 23.95 | 23.94 |
|                 |       |     |    | 3     | 23.69 | 23.81 | 24.80 |
|                 |       |     | 25 | 1     | 24.44 | 24.65 | 25.58 |
|                 |       |     |    | 2     | 25.65 | 25.18 | 25.69 |
|                 |       |     |    | 3     | 24.21 | 25.12 | 24.72 |
|                 |       |     | 30 | 1     | 23.12 | 21.76 | 22.72 |
|                 |       |     |    | 2     | 22.86 | 22.65 | 22.79 |
|                 |       |     |    | 3     | 23.03 | 22.57 | 23.29 |
|                 |       | 120 | 20 | 1     | 24.49 | 22.92 | 23.86 |
|                 |       |     |    | 2     | 25.01 | 25.34 | 25.40 |
|                 |       |     |    | 3     | 26.14 | 24.74 | 25.43 |
|                 |       |     | 25 | 1     | 24.44 | 23.93 | 24.09 |
|                 |       |     |    | 2     | 24.75 | 24.59 | 23.99 |
|                 |       |     |    | 3     | 24.51 | 24.31 | 24.66 |
|                 |       |     | 30 | 1     | 22.84 | 23.18 | 23.77 |

|                 |     |        |       |       |       |       |       |       |
|-----------------|-----|--------|-------|-------|-------|-------|-------|-------|
| ZR BashingBeads |     | 180    | 20    | 2     | 24.60 | 22.10 | 23.20 |       |
|                 |     |        |       | 3     | 23.10 | 23.77 | 23.65 |       |
|                 |     |        |       | 1     | 23.51 | 23.96 | 24.55 |       |
|                 |     |        | 2     | 23.97 | 23.59 | 23.97 |       |       |
|                 |     |        | 3     | 23.81 | 23.74 | 23.99 |       |       |
|                 |     |        | 25    | 1     | 23.20 | 24.54 | 24.06 |       |
|                 |     | 2      | 24.38 | 24.25 | 23.79 |       |       |       |
|                 |     | 3      | 25.22 | 24.37 | 25.16 |       |       |       |
|                 |     | 30     | 1     | 22.43 | 23.17 | 24.03 |       |       |
|                 |     | 2      | 23.74 | 23.92 | 24.54 |       |       |       |
|                 |     | 3      | 24.29 | 25.23 | 24.79 |       |       |       |
|                 |     | 50,000 | 60    | 20    | 1     | 26.25 | 26.66 | 26.52 |
|                 |     |        |       |       | 2     | 26.17 | 26.99 | 26.63 |
|                 |     |        |       |       | 3     | 26.11 | 27.33 | 26.82 |
|                 |     |        |       | 25    | 1     | 28.60 | 28.29 | 27.49 |
|                 |     |        |       |       | 2     | 27.56 | 27.79 | 25.90 |
|                 |     |        |       |       | 3     | 27.36 | 27.33 | 27.36 |
|                 |     |        |       | 30    | 1     | 25.12 | 25.42 | 25.32 |
|                 | 2   |        |       |       | 25.05 | 25.01 | 25.84 |       |
|                 | 3   |        |       |       | 24.64 | 25.56 | 26.55 |       |
|                 | 120 |        | 20    | 1     | 26.07 | 25.79 | 26.03 |       |
|                 |     |        |       | 2     | 26.05 | 26.68 | 25.91 |       |
|                 |     |        |       | 3     | 27.57 | 27.32 | 27.79 |       |
|                 |     |        | 25    | 1     | 27.35 | 25.70 | 26.45 |       |
|                 |     |        |       | 2     | 26.62 | 25.80 | 27.85 |       |
|                 |     |        |       | 3     | 27.50 | 27.08 | 27.22 |       |
|                 |     |        | 30    | 1     | 27.32 | 26.17 | 25.26 |       |
|                 |     |        |       | 2     | 26.00 | 26.81 | 27.08 |       |
|                 |     |        |       | 3     | 26.42 | 26.91 | 26.68 |       |
|                 | 180 | 20     | 1     | 27.12 | 27.28 | 26.94 |       |       |
|                 |     |        | 2     | 27.57 | 27.32 | 27.14 |       |       |
|                 |     |        | 3     | 26.49 | 23.95 | 25.43 |       |       |
|                 |     | 25     | 1     | 25.77 | 25.75 | 27.13 |       |       |
|                 |     |        | 2     | 27.42 | 26.51 | 25.51 |       |       |
|                 |     |        | 3     | 27.81 | 27.25 | 26.37 |       |       |
|                 |     | 30     | 1     | 28.13 | 26.99 | 26.63 |       |       |
|                 |     |        | 2     | 27.23 | 26.46 | 27.67 |       |       |
|                 |     |        | 3     | 26.65 | 26.90 | 25.78 |       |       |

|                    |        |    |    |   |       |       |       |
|--------------------|--------|----|----|---|-------|-------|-------|
| none<br>(controls) | 1,000  | NA | NA | 1 | 22.01 | 20.91 | 21.51 |
|                    |        |    |    | 2 | 21.59 | 20.89 | 21.97 |
|                    |        |    |    | 3 | 20.82 | 21.92 | 21.93 |
|                    | 5,000  |    |    | 1 | 25.14 | 24.39 | 25.90 |
|                    |        |    |    | 2 | 25.85 | 26.54 | 26.55 |
|                    |        |    |    | 3 | 27.31 | 25.49 | 27.42 |
|                    | 50,000 |    |    | 1 | 26.83 | 28.77 | 26.35 |
|                    |        |    |    | 2 | 26.65 | 27.95 | 27.56 |
|                    |        |    |    | 3 | 27.70 | 28.58 | 28.35 |

NA : not applicable
